1 **Bacterial contribution to genesis of the novel germ line determinant *oskar***

2

3 *Leo Blondel*<sup>1</sup>, *Tamsin E. M. Jones*<sup>2,3</sup> and *Cassandra G. Extavour*<sup>1,2\*</sup>

4

5 1. Department of Molecular and Cellular Biology, Harvard University, 16 Divinity Avenue,  
6 Cambridge MA, USA

7 2. Department of Organismic and Evolutionary Biology, Harvard University, 16 Divinity  
8 Avenue, Cambridge MA, USA

9 3. Current address: European Bioinformatics Institute, EMBL-EBI, Wellcome Genome  
10 Campus, Hinxton, Cambridgeshire, UK

11

12 \* correspondence to [extavour@oeb.harvard.edu](mailto:extavour@oeb.harvard.edu)

13

14 **New cellular functions and developmental processes can evolve by modifying the functions**  
15 **or regulation of preexisting genes, but the creation of new genes and their contributions to**  
16 **novel processes is less well understood. New genes can arise not only from mutations or**  
17 **rearrangements of existing sequences, but also via acquisition of foreign DNA, also called**  
18 **horizontal gene transfer (HGT). Here we present evidence that HGT contributed to the**  
19 **creation of a novel gene indispensable for reproduction in some insects. The *oskar* gene**  
20 **evolved to fulfil a crucial role in insect germ cell formation, but was long considered a novel**  
21 **gene with unknown evolutionary origins. Our analysis of over 100 Oskar sequences**  
22 **suggests that Oskar arose through a novel gene formation history involving fusion of**  
23 **eukaryotic and prokaryotic sequences. One of its two conserved domains (LOTUS), was**

24 **likely present in the genome of a last common insect ancestor, while the second (OSK)**  
25 **domain appears to have been acquired through horizontal transfer of a bacterial GDSL-**  
26 **like lipase domain. Our evidence suggests that the bacterial contributor of the OSK domain**  
27 **may have been a germ line endosymbiont. This shows that gene origin processes often**  
28 **considered highly unusual, including HGT and de novo coding region evolution, can give**  
29 **rise to novel genes that can both participate in pre-existing gene regulatory networks, and**  
30 **also facilitate the evolution of novel developmental mechanisms.**

31 Heritable variation is the raw material of evolutionary change. Genetic variation can arise  
32 from mutation and gene duplication of existing genes<sup>1</sup>, or through *de novo* processes<sup>2</sup>, but the  
33 extent to which such novel, or “orphan” genes participate significantly in the evolutionary  
34 process is unclear. Mutation of existing cis-regulatory<sup>3</sup> or protein coding regions<sup>4</sup> can drive  
35 evolutionary change in developmental processes. However, recent studies in animals and fungi  
36 suggest that new genes can also drive phenotypic change<sup>5</sup>. Although counterintuitive, novel  
37 genes may be integrating continuously into otherwise conserved gene networks, with a higher  
38 rate of partner acquisition than subtler variations on preexisting genes<sup>6</sup>. Moreover, in humans  
39 and fruit flies, a large proportion of new genes are expressed in the brain, suggesting their  
40 participation in the evolution of major organ systems<sup>7,8</sup>. However, while next generation  
41 sequencing has improved their discovery, the developmental and evolutionary significance of  
42 new genes remains understudied.

43 The mechanism of formation of a new gene may have implications for its function. New  
44 genes that arise by duplication, thus possessing the same biophysical properties as their parent  
45 genes, have innate potential to participate in preexisting cellular and molecular mechanisms<sup>1</sup>.  
46 However, orphan genes lacking sequence similarity to existing genes must form novel functional

47 molecular relationships with extant genes, in order to persist in the genome. When such genes  
48 arise by introduction of foreign DNA into a host genome through horizontal gene transfer  
49 (HGT), they may introduce novel, already functional sequence information into a genome.  
50 Whether genes created by HGT show a greater propensity to contribute to or enable novel  
51 processes is unclear. Endosymbionts in the host germ line cytoplasm (germ line symbionts)  
52 could increase the occurrence of evolutionarily relevant HGT events, as foreign DNA integrated  
53 into the germ line genome is transferred to the next generation. HGT from bacterial  
54 endosymbionts into insect genomes appears widespread, involving transfer of metabolic genes or  
55 even larger genomic fragments to the host genome<sup>9</sup>.

56 Here we examined the evolutionary origins of the *oskar* (*osk*) gene, long considered a  
57 novel gene that evolved to be indispensable for insect reproduction<sup>10</sup>. First discovered in  
58 *Drosophila melanogaster*<sup>11</sup>, *osk* is necessary and sufficient for assembly of germ plasm, a  
59 cytoplasmic determinant that specifies the germ line in the embryo. Germ plasm-based germ line  
60 specification appears derived within insects, confined to insects that undergo metamorphosis  
61 (Holometabola)<sup>12,13</sup>. Initially thought exclusive to Diptera (flies and mosquitoes), its discovery in  
62 a wasp, another holometabolous insect with germ plasm<sup>14</sup>, led to the hypothesis that *oskar*  
63 originated as a novel gene at the base of the Holometabola approximately 300 Mya, facilitating  
64 the evolution of insect germ plasm as a novel developmental mechanism<sup>14</sup>. However, its  
65 subsequent discovery in a cricket<sup>12</sup>, a basally branching insect without germ plasm<sup>15</sup>, implied  
66 that *osk* was instead at least 50 My older, and that its germ plasm role was derived rather than  
67 ancestral<sup>16</sup>. Despite its orphan gene status, *osk* plays major developmental roles, interacting with  
68 the products of many genes highly conserved across animals<sup>10,17,18</sup>. *osk* thus represents an  
69 example of a new gene that not only functions within pre-existing gene networks in the nervous

70 system<sup>12</sup>, but has also evolved into the only animal gene known to be both necessary and  
71 sufficient for germ line specification<sup>19,20</sup>.

72 The evolutionary origins of this remarkable gene are unknown. *Osk* contains two  
73 biophysically conserved domains, an N-terminal LOTUS domain and a C-terminal hydrolase-  
74 like domain called OSK<sup>17,21</sup> (Fig. 1a). A BLASTp search using the full-length *D. melanogaster*  
75 *osk* sequence as a query yielded only other holometabolous *osk* genes (E-value < 0.01), or hits  
76 for the LOTUS or OSK domains (E-value <10) (Supplementary files: BLAST search results).  
77 This suggested that full length *osk* was unlikely to be a duplication of any other known gene,  
78 prompting us to perform a BLASTp search on each conserved *Osk* protein domain individually.  
79 Strikingly, in our BLASTp search, we recovered no eukaryotic sequences that resembled the  
80 OSK domain (E-value < 10) (Supplementary files: BLAST search results).

81 To understand this anomaly, we built an alignment of 95 Oskar sequences  
82 (Supplementary files: Alignments>OSKAR\_FINAL.fasta) and used a custom iterative HMMER  
83 sliding window search tool to compare each domain with protein sequences from all domains of  
84 life. Sequences most similar to the LOTUS domain were almost exclusively eukaryotic  
85 sequences (Supplementary Table 3). In contrast, those most similar to the OSK domain were  
86 bacterial, specifically sequences similar to SGNH-like hydrolases<sup>17,21</sup> (Pfam Clan:  
87 SGNH\_hydrolase - CL0264; Supp. Table 4; Fig. 1b). To visualize their relationships, we  
88 graphed the sequence similarity network for the sequences of these domains and their closest  
89 hits. We observed that the majority of LOTUS domain sequences clustered within eukaryotic  
90 sequences (Fig. 1c). In contrast, OSK domain sequences formed an isolated cluster, a small  
91 subset of which formed a connection to bacterial sequences (Fig. 1d). These data are consistent  
92 with a previous suggestion, based on BLAST results<sup>14</sup>, that HGT from a bacterium into an

93 ancestral insect genome may have contributed to the evolution of *osk*. However, this possibility  
94 was not adequately addressed by previous analyses, which were based on alignments of full  
95 length Osk containing only eukaryotic sequences as outgroups<sup>12</sup>. To rigorously test this  
96 hypothesis, we therefore performed phylogenetic analyses of the two domains independently. A  
97 finding that LOTUS sequences branch within eukaryotes, while OSK sequences branch within  
98 bacteria, would provide support for the HGT hypothesis.

99         Both Maximum likelihood and Bayesian approaches confirmed this prediction (Fig. 2).  
100 As expected, LOTUS sequences from Osk proteins were related to other eukaryotic LOTUS  
101 domains, to the exclusion of the only three bacterial sequences with sufficient similarity to  
102 include in the analyses (Figs. 2a, S1, S2; see Methods and Supplemental Text). In contrast, OSK  
103 domain sequences branched within bacterial sequences (Fig. 2b, S3, S4). Importantly, OSK  
104 sequences did not simply form an outgroup to bacterial sequences. Instead, they formed a well-  
105 supported clade nested within bacterial GDSL-like lipase sequences. The majority of these  
106 bacterial sequences were from the Firmicutes, a bacterial phylum known to include insect  
107 germline symbionts<sup>22,23</sup>. All other sequences from classified bacterial species, including a clade  
108 branching basally to all other sequences, belonged either to the Bacteroidetes or to the  
109 Proteobacteria. Members of both of these phyla are also known germline symbionts of insects<sup>9,24</sup>  
110 and other arthropods<sup>25</sup>. In sum, the distinct phylogenetic relationships of the two domains of  
111 Oskar are consistent with a bacterial origin for the OSK domain. Further, the specific bacterial  
112 clades close to OSK suggest that an ancient arthropod germ line endosymbiont could have been  
113 the source of a GDSL-like sequence that was transferred into an ancestral insect genome, and  
114 ultimately gave rise to the OSK domain of *oskar*.

115 We then asked if two additional sequence characteristics, GC3 content and codon use,  
116 were consistent with distinct domain of life origins for the two Oskar domains<sup>26</sup>. Under our  
117 hypothesis, the HGT event that contributed to *oskar*'s formation would have occurred at least  
118 480 Mya, in a common insect ancestor<sup>27</sup>. We reasoned that if evolutionary time had not  
119 completely erased such signatures from the putative bacterially donated sequence (OSK), we  
120 might detect differences from the LOTUS domain, and from the host genome. Thus, we  
121 performed a parametric analysis of these parameters for 17 well annotated insect genomes  
122 (Supplementary Table 5). To quantify the null hypothesis, we calculated an “Intra-Gene  
123 distribution” for all genes in the genome, which showed a linear correlation between codon use  
124 in the 5' and 3' halves of a given gene. In contrast, the codon use between the LOTUS and OSK  
125 domains did not follow this correlation for nearly all measures of codon use (Fig. 3a, 3b, S5). For  
126 each genome, we then calculated the residuals of the Intra-Gene distribution and the LOTUS-  
127 OSK pair. Pooling the residuals together revealed that the GC3 content was drastically different  
128 between the LOTUS and OSK domains, compared to what would be expected within an average  
129 gene in that genome (Fig. 3c). Finally, to quantify the codon use difference, we compared the  
130 cosine distance in codon use between the LOTUS and OSK domains, with that of the Inter-Gene  
131 and Intra-Gene distributions. We found that the LOTUS-OSK distance was closer to that  
132 measured between two different, random genes, than between two parts of the same gene (Inter-  
133 Gene and Intra-Gene distributions, respectively; Fig. 3d). In sum, whereas most genes have  
134 similar codon use across all regions of their coding sequence, the OSK and LOTUS domains of  
135 *oskar* use codons in different ways. Together with the phylogenetic and sequence similarity  
136 evidence presented above, these analyses are consistent with an HGT origin for the OSK domain  
137 (Fig. 4).

138           While multiple mechanisms can give rise to new genes, HGT is arguably among the least  
139 well understood, as it involves multiple genomes and ancient biotic interactions between donor  
140 and host organisms that are often difficult to reconstruct. In the case of *oskar*, however, the fact  
141 that both germline symbionts<sup>28</sup> and HGT events<sup>9</sup> are widespread in insects, provides a plausible  
142 biological mechanism consistent with our hypothesis that fusion of eukaryotic and bacterial  
143 domain sequences led to the birth of this novel gene.

144           Once arisen, novel genes might be expected to disappear rapidly, given that pre-existing  
145 gene regulatory networks operated successfully without them<sup>1</sup>. However, it is clear that new  
146 genes can evolve functional connections with existing networks, become essential<sup>29</sup>, and in some  
147 cases lead to new functions<sup>30</sup> and contribute to phenotypic diversity<sup>5</sup>. *oskar* plays multiple  
148 critical roles in insect development, from neural patterning<sup>12,31</sup> to oogenesis<sup>32</sup>. In the  
149 Holometabola, a clade of nearly one million extant species<sup>33</sup>, *oskar*'s co-option to become  
150 necessary and sufficient for germ plasm assembly is likely the cell biological mechanism  
151 underlying the evolution of this derived mode of insect germ line specification<sup>12,14,16</sup>. Our study  
152 thus provides evidence that HGT can not only introduce functional genes into a host genome, but  
153 also, by contributing sequences of individual domains, generate genes with entirely novel  
154 domain structures that may facilitate the evolution of novel developmental mechanisms.

## 155 References

- 1 Taylor, J. S. & Raes, J. Duplication and divergence: the evolution of new genes and old ideas. *Annual review of genetics* **38**, 615-643 (2004).
- 2 Tautz, D. & Domazet-Loso, T. The evolutionary origin of orphan genes. *Nat. Rev. Genet.* **12**, 692-702, doi:10.1038/nrg3053 (2011).
- 3 Wittkopp, P. J. & Kalay, G. Cis-regulatory elements: molecular mechanisms and evolutionary processes underlying divergence. *Nat. Rev. Genet.* **13**, 59-69, doi:10.1038/nrg3095 (2011).
- 4 Hoekstra, H. E. & Coyne, J. A. The locus of evolution: evo devo and the genetics of adaptation. *Evolution* **61**, 995-1016 (2007).
- 5 Chen, S., Krinsky, B. H. & Long, M. New genes as drivers of phenotypic evolution. *Nat. Rev. Genet.* **14**, 645-660, doi:10.1038/nrg3521 (2013).
- 6 Zhang, W., Landback, P., Gschwend, A. R., Shen, B. & Long, M. New genes drive the evolution of gene interaction networks in the human and mouse genomes. *Genome Biol.* **16**, 202, doi:10.1186/s13059-015-0772-4 (2015).
- 7 Zhang, Y. E., Landback, P., Vibranovski, M. & Long, M. New genes expressed in human brains: implications for annotating evolving genomes. *BioEssays* **34**, 982-991, doi:10.1002/bies.201200008 (2012).
- 8 Chen, S. *et al.* Frequent recent origination of brain genes shaped the evolution of foraging behavior in *Drosophila*. *Cell Reports* **1**, 118-132, doi:10.1016/j.celrep.2011.12.010 (2012).
- 9 Dunning Hotopp, J. C. *et al.* Widespread lateral gene transfer from intracellular bacteria to multicellular eukaryotes. *Science (New York, NY)* **317**, 1753-1756, doi:10.1126/science.1142490 (2007).
- 10 Lehmann, R. Germ Plasm Biogenesis--An Oskar-Centric Perspective. *Curr. Top. Dev. Biol.* **116**, 679-707, doi:10.1016/bs.ctdb.2015.11.024 (2016).
- 11 Lehmann, R. & Nüsslein-Volhard, C. Abdominal Segmentation, Pole Cell Formation, and Embryonic Polarity Require the Localized Activity of *oskar*, a Maternal Gene in *Drosophila*. *Cell* **47**, 144-152 (1986).
- 12 Ewen-Campen, B., Srouji, J. R., Schwager, E. E. & Extavour, C. G. *oskar* Predates the Evolution of Germ Plasm in Insects. *Curr. Biol.* **22**, 2278-2283 (2012).
- 13 Extavour, C. G. & Akam, M. E. Mechanisms of germ cell specification across the metazoans: epigenesis and preformation. *Development* **130**, 5869-5884 (2003).
- 14 Lynch, J. A. *et al.* The Phylogenetic Origin of *oskar* Coincided with the Origin of Maternally Provisioned Germ Plasm and Pole Cells at the Base of the Holometabola. *PLoS Genetics* **7**, e1002029, doi:10.1371/journal.pgen.1002029 (2011).
- 15 Ewen-Campen, B., Donoughe, S., Clarke, D. N. & Extavour, C. G. Germ cell specification requires zygotic mechanisms rather than germ plasm in a basally branching insect. *Curr. Biol.* **23**, 835-842 (2013).
- 16 Abouheif, E. Evolution: *oskar* Reveals Missing Link in Co-optive Evolution. *Curr. Biol.* **23**, R24-R25 (2012).
- 17 Jeske, M. *et al.* The Crystal Structure of the *Drosophila* Germline Inducer *Oskar* Identifies Two Domains with Distinct Vasa Helicase- and RNA-Binding Activities. *Cell Reports* **12**, 587-598, doi:10.1016/j.celrep.2015.06.055 (2015).
- 18 Jeske, M., Muller, C. W. & Ephrussi, A. The LOTUS domain is a conserved DEAD-box RNA helicase regulator essential for the recruitment of Vasa to the germ plasm and nuage. *Genes Dev.* **31**, 939-952, doi:10.1101/gad.297051.117 (2017).



- 19 Ephrussi, A. & Lehmann, R. Induction of germ cell formation by *oskar*. *Nature* **358**, 387-392 (1992).
- 20 Kim-Ha, J., Smith, J. L. & Macdonald, P. M. *oskar* mRNA is localized to the posterior pole of the *Drosophila* oocyte. *Cell* **66**, 23-35 (1991).
- 21 Yang, N. *et al.* Structure of *Drosophila* Oskar reveals a novel RNA binding protein. *Proc. Natl. Acad. Sci. USA* **112**, 11541-11546, doi:10.1073/pnas.1515568112 (2015).
- 22 Wheeler, D., Redding, A. J. & Werren, J. H. Characterization of an ancient lepidopteran lateral gene transfer. *PLoS ONE* **8**, e59262, doi:10.1371/journal.pone.0059262 (2013).
- 23 Chepkemoi, S. T. *et al.* Identification of *Spiroplasma* symbionts in *Anopheles gambiae*. *Wellcome Open Research* **2**, 90, doi:10.12688/wellcomeopenres.12468.1 (2017).
- 24 Zchori-Fein, E., Perlman, S. J., Kelly, S. E., Katzir, N. & Hunter, M. S. Characterization of a 'Bacteroidetes' symbiont in *Encarsia* wasps (Hymenoptera: Aphelinidae): proposal of 'Candidatus *Cardinium hertigii*'. *International Journal of Systematic and Evolutionary Microbiology* **54**, 961-968, doi:10.1099/ijs.0.02957-0 (2004).
- 25 Zchori-Fein, E. & Perlman, S. J. Distribution of the bacterial symbiont *Cardinium* in arthropods. *Mol. Ecol.* **13**, 2009-2016, doi:10.1111/j.1365-294X.2004.02203.x (2004).
- 26 Tuller, T. Codon bias, tRNA pools and horizontal gene transfer. *Mobile Genetic Elements* **1**, 75-77, doi:10.4161/mge.1.1.15400 (2011).
- 27 Misof, B. *et al.* Phylogenomics resolves the timing and pattern of insect evolution. *Science* **346**, 763-767, doi:10.1126/science.1257570 (2014).
- 28 Bourtzis, K. & Miller, T. A. in *Contemporary Topics in Entomology* Vol. 3 304 (CRC Press, Boca Raton, FL, 2006).
- 29 Chen, S., Zhang, Y. E. & Long, M. New genes in *Drosophila* quickly become essential. *Science* **330**, 1682-1685, doi:10.1126/science.1196380 (2010).
- 30 Cornelis, G. *et al.* Ancestral capture of syncytin-Car1, a fusogenic endogenous retroviral envelope gene involved in placentation and conserved in Carnivora. *Proc. Natl. Acad. Sci. USA* **109**, E432-441, doi:10.1073/pnas.1115346109 (2012).
- 31 Xu, X., Brechbiel, J. L. & Gavis, E. R. Dynein-Dependent Transport of nanos RNA in *Drosophila* Sensory Neurons Requires Rumpelstiltskin and the Germ Plasm Organizer Oskar. *The Journal of Neuroscience* **33**, 14791-14800, doi:10.1523/JNEUROSCI.5864-12.2013 (2013).
- 32 Jenny, A. *et al.* A translation-independent role of *oskar* RNA in early *Drosophila* oogenesis. *Development* **133**, 2827-2833 (2006).
- 33 Rees, J. A. & Cranston, K. Automated assembly of a reference taxonomy for phylogenetic data synthesis. *Biodiversity Data Journal* **5**, e12581, doi:10.3897/BDJ.5.e12581 (2017).
- 34 Gerlt, J. A. *et al.* Enzyme Function Initiative-Enzyme Similarity Tool (EFI-EST): A web tool for generating protein sequence similarity networks. *Biochimica et Biophysica Acta (BBA) - Proteins and Proteomics* **1854**, 1019-1037, doi:10.1016/j.bbapap.2015.04.015 (2015).

## **Acknowledgements**

This work was supported by funds from Harvard University. We thank Sean Eddy, Chuck Davis, and Extavour lab members for discussion.

## **Author Contributions**

CGME conceived of the project and overall experimental design. TEMJ collected initial transcriptome datasets and identified *oskar* orthologues therein. LB built the HMM model, identified additional orthologues, and performed sequence, phylogenetic, cluster and codon use analyses. LB and CGME interpreted data and wrote the manuscript.

## **Author Information**

The authors declare no competing interests.

Figure 1  
Blondel, Jones & Extavour

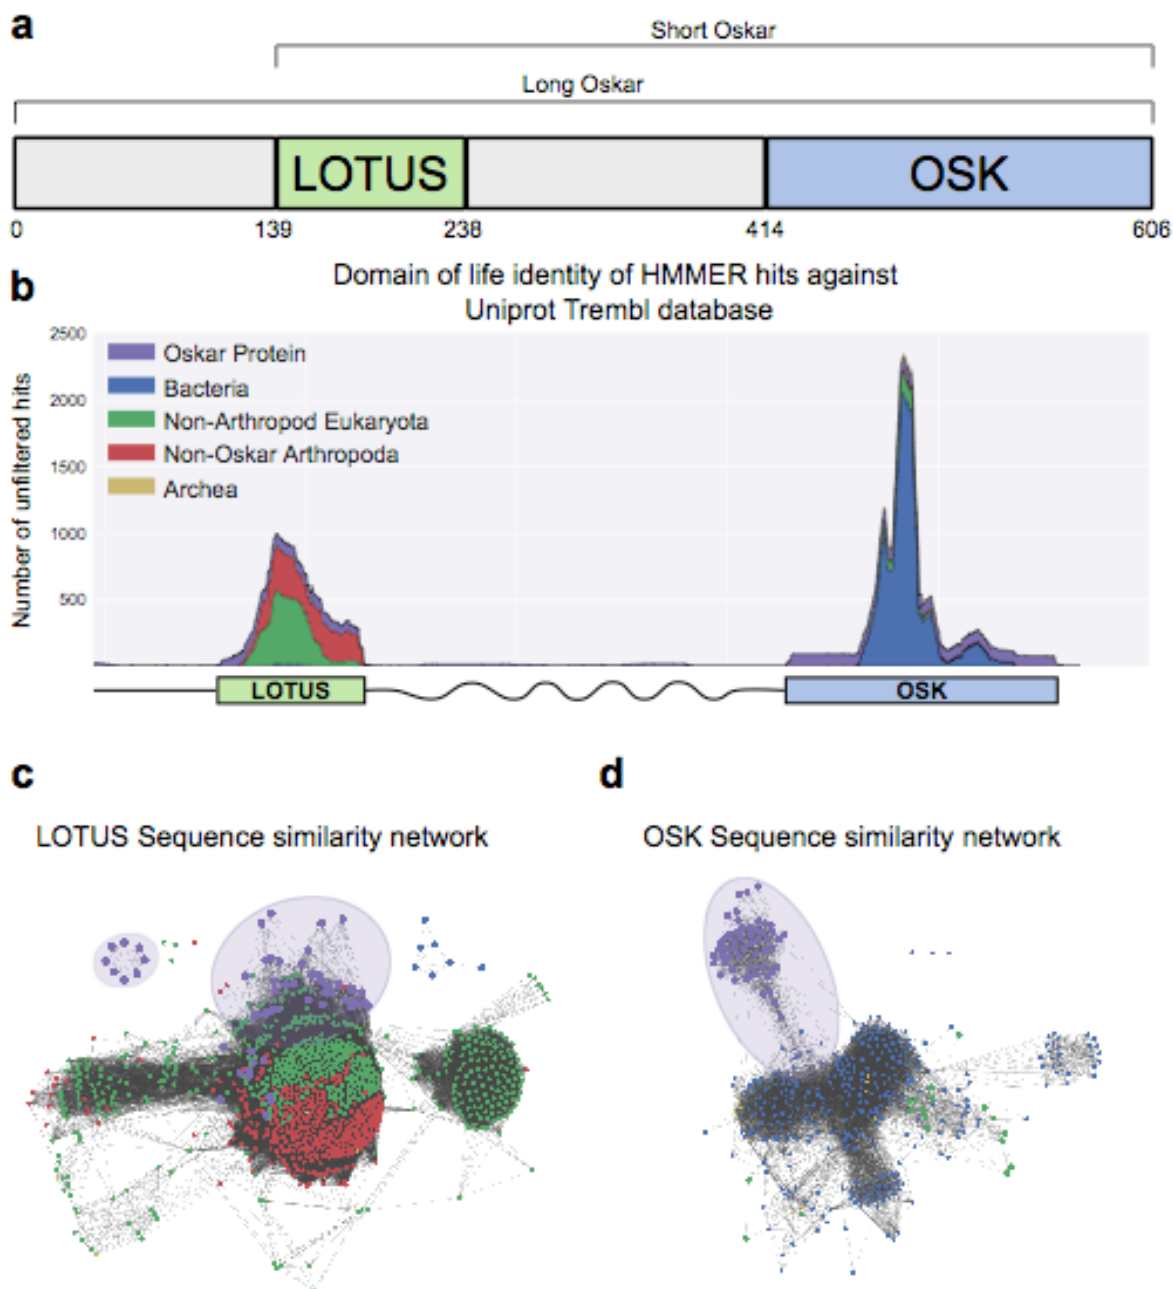

**Figure 1. Sequence analysis of the Oskar gene.** **a**, Schematic representation of the Oskar gene. The LOTUS and OSK hydrolase-like domains are separated by a poorly conserved region of predicted high disorder and variable length between species. In some dipterans, a region 3' to the LOTUS domain is translated to yield a second isoform, called Long Oskar. Residue numbers correspond to the *D. melanogaster* Osk sequence. **b**, Stackplot of domain of life identity of HMMER hits across the protein sequence. For a sliding window of 60 Amino Acids across the protein sequence (X axis), the number of hits in the Trembl (UniProt) database (Y axis) is represented and color coded by domain of life origin (see Methods: Iterative HMMER search of OSK and LOTUS domains), stacked on top of each other. **c**, **d** EFI-EST<sup>34</sup>-generated graphs of the sequence similarity network of the LOTUS (**c**) and OSK (**d**) domains of Oskar. Sequences were obtained using HMMER against the UniProtKB database. Most Oskar LOTUS sequences cluster within eukaryotes and arthropods. In contrast, Oskar OSK sequences cluster most strongly with a small subset of bacterial sequences.

Figure 2  
Blondel, Jones & Extavour

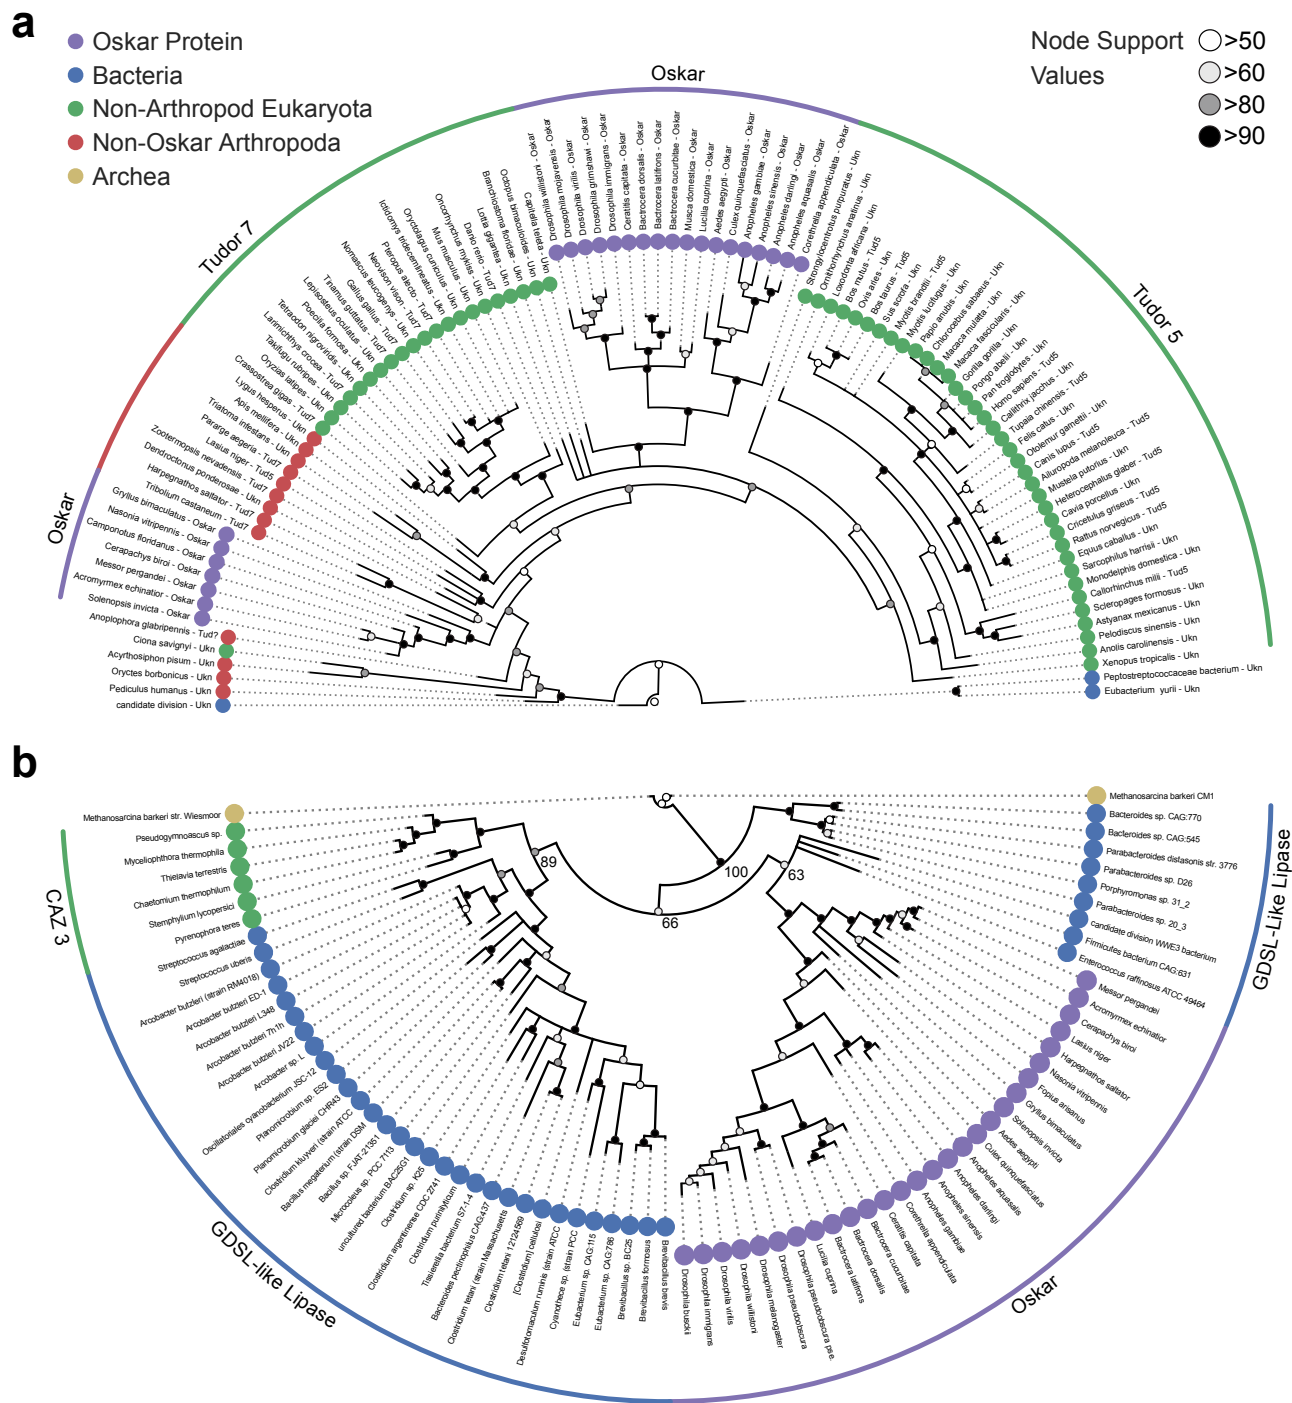

Figure 3  
Blondel, Jones & Extavour

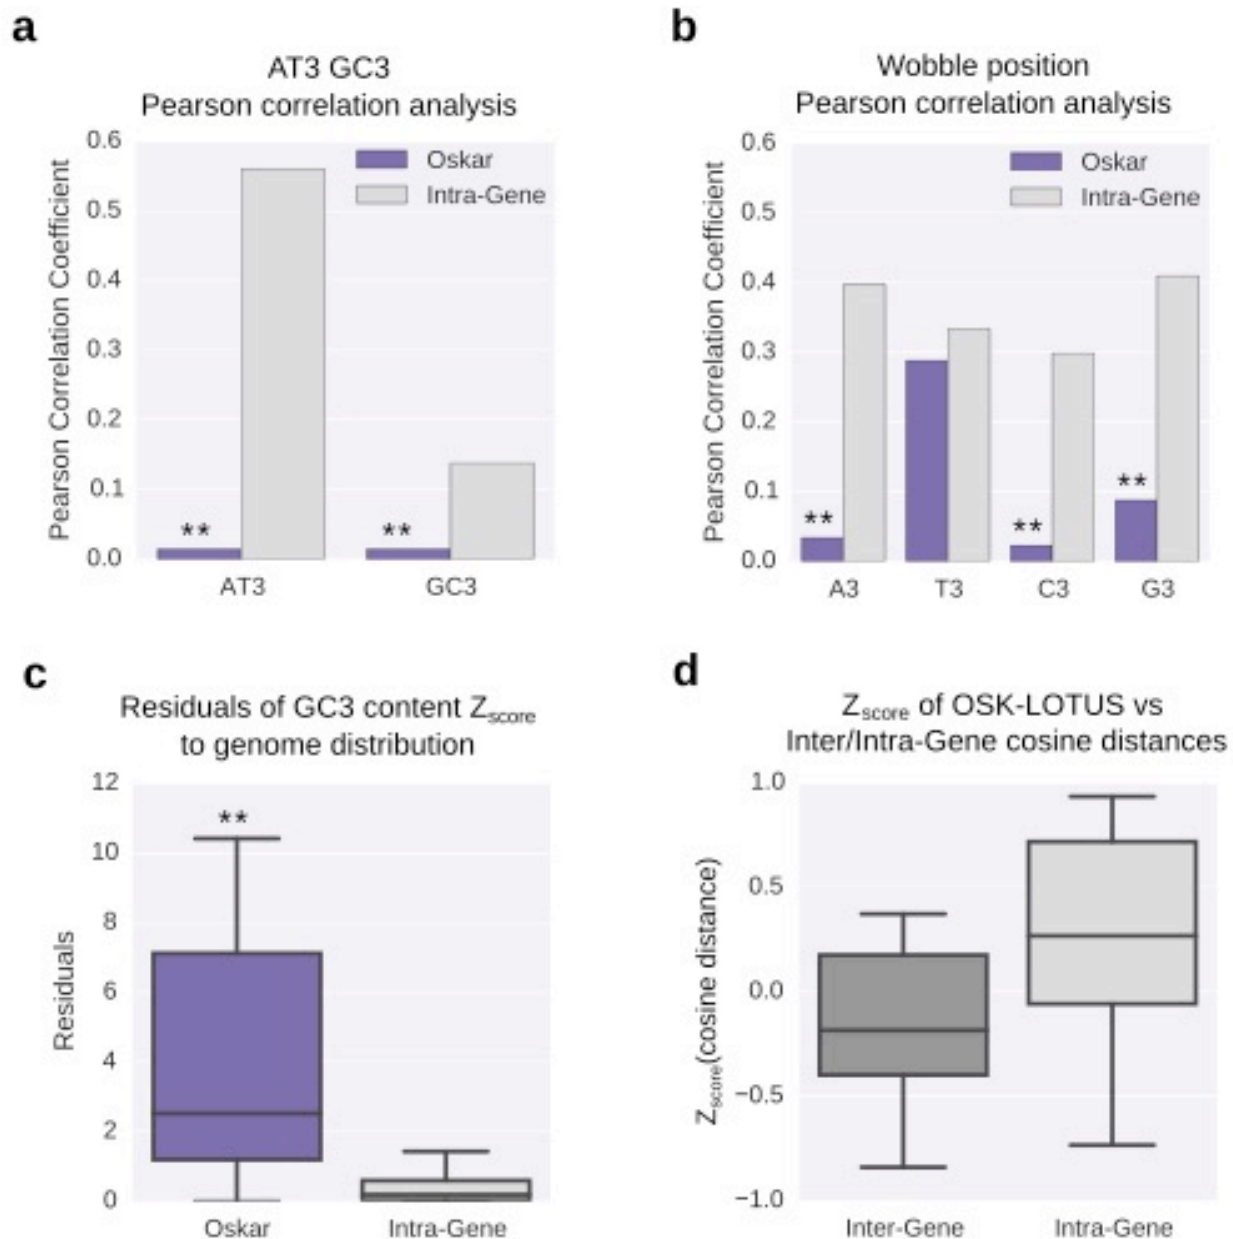

**Figure 3. Parametric analysis of codon use for the LOTUS and OSK domains.** **a**, Pearson correlation analysis of AT3 and GC3 content for Oskar vs other genes. AT3 and GC3 content are correlated across the sequence of a gene for all genes in a given genome (grey), but not between the LOTUS and OSK domains of Oskar (purple). (\*\*: Pearson correlation p-value > 0.1) **b**, Pearson correlation analysis of wobble position identity for the Oskar gene vs other genes. Wobble position identity content is correlated across the sequence of a gene for all genes in a given genome (grey) but not between the LOTUS and OSK domains of Oskar (purple), with the exception of T3. (\*\*: Pearson correlation p-value > 0.1) **c**, Analysis of GC3 content. Measure of the residuals of Z scores for Oskar gene GC3 content (LOTUS vs OSK) and the Intra-Gene GC3 content. The GC3 content of the LOTUS and OSK domains does not follow a linear relationship, and the residuals are significantly higher (purple) than those observed within across the sequences of other genes within a given genome (grey). (\*\* : Mann-Whitney U test p-value <  $10^{-5}$ ) **d**, Cosine distance analysis of codon frequencies. The distance distribution in codon use between the LOTUS and OSK domain is less than the measured null distribution distance in codon use between any two unrelated genes (Inter-Gene; dark grey), but greater than the expected distance within a gene (Intra-Gene; light grey).

Figure 4  
Blondel, Jones & Extavour

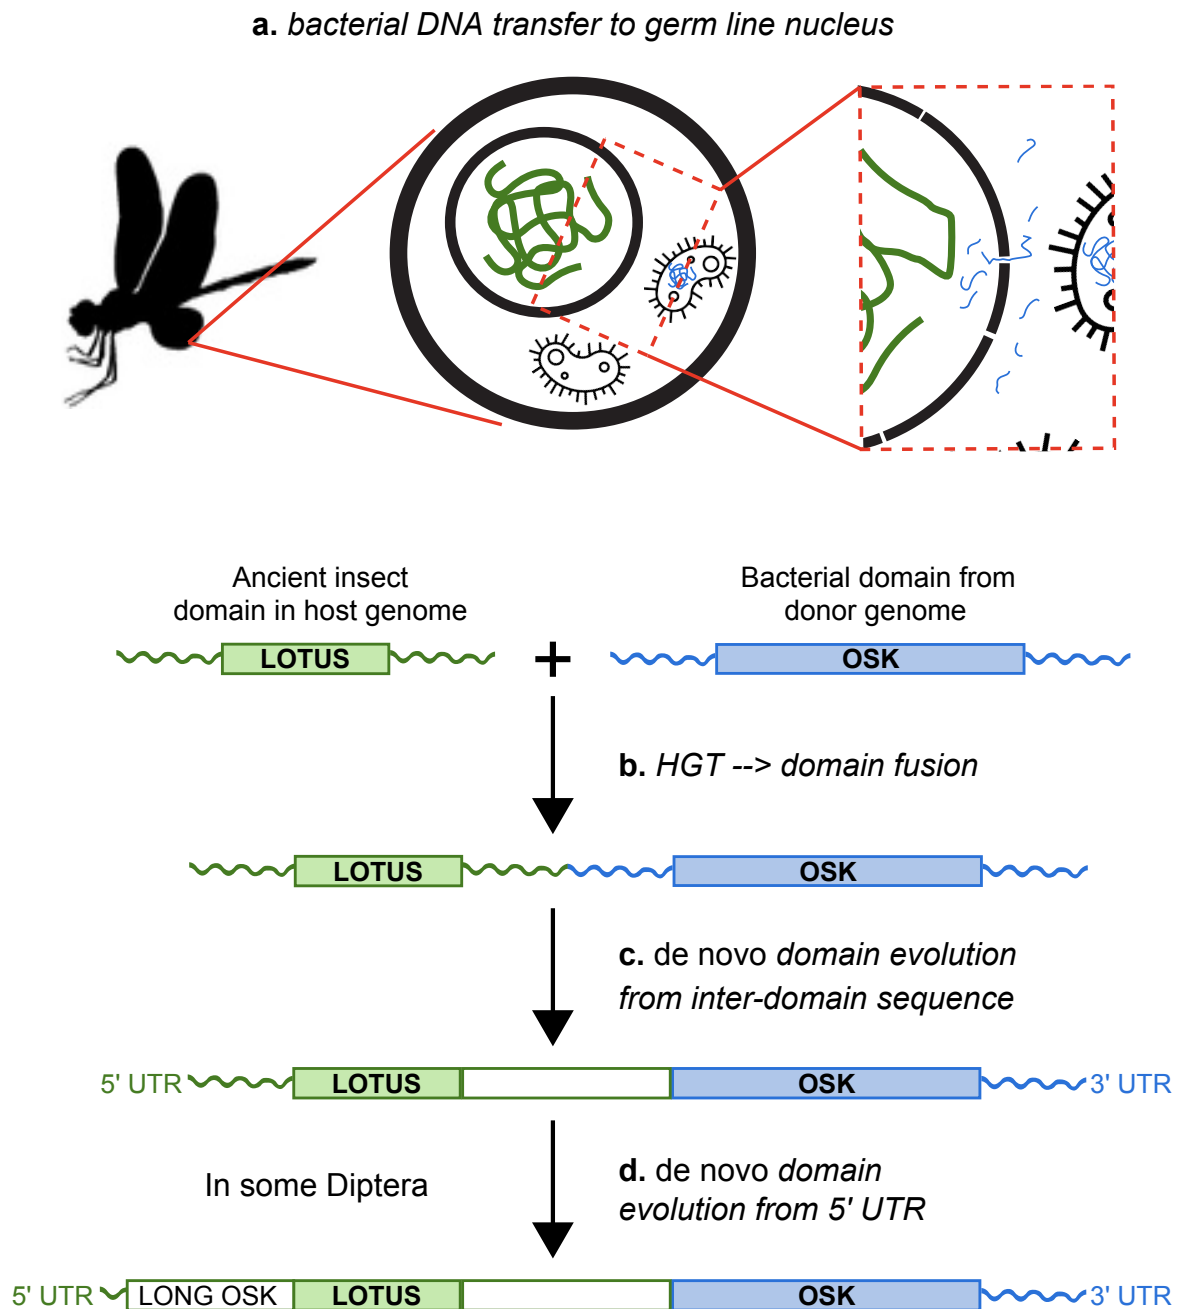

**Figure 4. Hypothesis for the origin of *oskar*.** Integration of the OSK domain close to a LOTUS domain in an ancestral insect genome. **a**, DNA containing a GDSL-like domain from an endosymbiotic germ line bacterium is transferred to the nucleus of a germ cell in an insect common ancestor. **b**, DNA damage or transposable element activity induces an integration event in the host genome, close to a pre-existing LOTUS-like domain. **c**, The region between the two domains undergoes *de novo* coding evolution, creating an open reading frame with a unique, chimeric domain structure. **d**, In some Diptera, including *D. melanogaster*, part of the 5' UTR of *oskar* undergoes *de novo* coding evolution to form the Long Oskar domain.

## Methods

### ***BLAST searches of oskar***

All BLAST<sup>1</sup> searches were performed using the NCBI BLASTp tool suite on the non-redundant (nr) database. Amino Acid (AA) sequences of *D. melanogaster* full length Oskar (EMBL ID AAF54306.1), as well as the AA sequences for the LOTUS (AA 139-238) and OSK (AA 414-606) domains were used for the BLAST searches, using the default NCBI cut-off parameters. As per NCBI defaults, the E-value cut-off was set at 10. All BLAST searches results are included in the Supplementary files: BLAST search results.

### ***Hidden Markov Model (HMM) generation and alignments of the OSK and LOTUS domains***

101 1KITE transcriptomes<sup>2</sup> (Supplementary Table 1) were downloaded and searched using the local BLAST program (BLAST+) using the tblastn algorithm with default parameters, with Oskar protein sequences of *Drosophila melanogaster*, *Aedes aegypti*, *Nasonia vitripennis* and *Gryllus bimaculatus* as queries (EntrezIDs: NP\_731295.1, ABC41128.1, NP\_001234884.1 and AFV31610.1 respectively). For all of these 1KITE transcriptome searches, predicted protein sequences from transcript data were obtained by in silico translation using the online ExpASy translate tool (<https://web.expasy.org/translate/>), taking the longest open reading frame. Publicly available sequences in the non-redundant (nr), TSA databases at NCBI, and a then-unpublished transcriptome<sup>3</sup> (kind gift of Matthew Benton and Siegfried Roth, University of Cologne) were subsequently searched using the web-based BLAST tool hosted at NCBI, using the tblastn algorithm with default parameters. Sequences used for queries were the four Oskar proteins described above, and newfound *oskar* sequences from the 1KITE transcriptomes of *Baetis pumilis*, *Cryptocercus wrighti*, and *Frankliniella cephalica*. For both searches, *oskar* orthologs were identified by the presence of BLAST hits on the same transcript to both the LOTUS (N-terminal) and OSK (C-terminal) regions of any of the query

*oskar* sequences, regardless of E-values. The sequences found were aligned using MUSCLE (8 iterations)<sup>4</sup> into a 46-sequence alignment (Supplementary files: Alignments>OSKAR\_INITIAL.fasta). From this alignment, the LOTUS and OSK domains were extracted (Supplementary files: Alignments>LOTUS\_INITIAL.fasta and Alignments>OSK\_INITIAL.fasta) to define the initial Hidden Markov Models (HMM) using the hmmbuild tool from the HMMER tool suite with default parameters<sup>5</sup>. 126 insect genomes and 128 insect transcriptomes (from the Transcriptome Shotgun Assembly TSA database: <https://www.ncbi.nlm.nih.gov/Traces/wgs/?view=TSA>) were subsequently downloaded from NCBI (download date September 29, 2015 ; Supplementary table 1). Genomes were submitted to Augustus v2.5.5<sup>6</sup> (using the *D. melanogaster* exon HMM predictor) and SNAP v2006-07-28<sup>7</sup> (using the default ‘fly’ HMM) for gene discovery. The resulting nucleotide sequence database comprising all 309 downloaded and annotated genomes and transcriptomes, was then translated in six frames to generate a non-redundant amino acid database (where all sequences with the same amino acid content are merged into one). This process was automated using a series of custom scripts available here: <https://github.com/Xqua/Genomes>. The non-redundant amino acid database was searched using the HMMER v3.1 tool suite<sup>5</sup> and the HMM for the LOTUS and OSK domains described above. A hit was considered positive if it consisted of a contiguous sequence containing both a LOTUS domain and an OSK domain, with the two domains separated by an inter-domain sequence. We imposed no length, alignment or conservation criteria on the inter-domain sequence, as this is a rapidly-evolving region of Oskar protein with predicted high disorder<sup>8-10</sup>. Positive hits were manually curated and added to the main alignment, and the search was performed iteratively until no more new sequences meeting the above criteria were discovered. This resulted in a total of 95 Oskar protein sequences, (see Supplementary Table 2 for the complete list). Using the final resulting alignment (Supplementary Files: Alignments>OSKAR\_FINAL.fasta), the LOTUS and OSK domains were extracted from these sequences (Supplementary Files: Alignments>LOTUS\_FINAL.fasta and Alignments>OSK\_FINAL.fasta), and the final three HMM (for full-length Oskar, OSK, and LOTUS



domains) used in subsequent analyses were created using hmmbuild with default parameters (Supplementary files: HMM>OSK.hmm, HMM>LOTUS.hmm and HMM>OSKAR.hmm).

### ***Iterative HMMER search of OSK and LOTUS domains***

A reduced version of TrEMBL<sup>11</sup> (v2016-06) was created by concatenating all hits (regardless of E-value) for sequences of the LOTUS domain, the OSK domain and full-length Oskar, using hmmsearch with default parameters and the HMM models created above from the final alignment. This reduced database was created to reduce potential false positive results that might result from the limited size of the sliding window used in the search approach described here. The full-length Oskar alignment of 1133 amino acids (Supplementary files: Alignments>OSKAR\_FINAL.fasta) was split into 934 sub-alignments of 60 amino acids each using a sliding window of one amino acid. Each alignment was converted into a HMM using hmmbuild, and searched against the reduced TrEMBL database using hmmsearch using default parameters. Domain of life origin of every hit sequence at each position was recorded. Eukaryotic sequences were further classified as Oskar/Non-Oskar and Arthropod/Non-Arthropod. Finally, for the whole alignment, the counts for each category were saved and plotted in a stack plot representing the proportion of sequences from each category to create Fig. 1b. The python code used for this search is available at <https://github.com/Xqua/Iterative-HMMER>.

### ***Sequence Similarity Networks***

LOTUS and OSK domain sequences from the final alignment obtained as described above (see “*Hidden Markov Model (HMM) generation and alignments of the OSK and LOTUS domains*”; Supplementary files: Alignments>LOTUS\_FINAL.fasta and Alignments>OSK\_FINAL.fasta) were searched against TrEMBL<sup>11</sup> (v2016-06) using HMMER. All hits with E-value < 0.01 were consolidated into a fasta file that was then entered into the EFI-EST tool<sup>12</sup> using default parameters to generate a sequence similarity network. An alignment score corresponding to 30% sequence identity

was chosen for the generation of the final sequence similarity network. Finally, the network was graphed using Cytoscape 3<sup>13</sup>.

### ***Phylogenetic Analysis***

For both the LOTUS and OSK domains, in cases where more than one sequence from the same organism was retrieved by the search described above in “*Iterative HMMER Search of OSK and LOTUS domains*”, only the sequence with the lowest E-value was used for phylogenetic analysis. For the LOTUS domain, the first 97 best hits (lowest E-value) were selected, and the only three bacterial sequences that satisfied an E-value < 0.01 were manually added. For the OSK domain, the first 95 best hits (lowest E-value) were selected, and the only five eukaryotic sequences that satisfied an E-value < 0.01 were manually added. The sequences were filtered to contain only one sequence per species (best E-value kept) generating a set of 100 sequences for the LOTUS domain, and 87 for the OSK domain. Unique identifiers for all sequences used to generate alignments for phylogenetic analysis are available in Supplementary Tables S3, S4. For both datasets, the sequences were then aligned using MUSCLE<sup>4</sup> (8 iterations) and trimmed using trimAl<sup>14</sup> with 70% occupancy. The resulting alignments that were subject to phylogenetic analysis are available in Supplementary Files:

Alignments>LOTUS\_TREE.fasta and Alignments>OSK\_TREE.fasta. For the maximum likelihood tree, we used RaxML v8.2.4<sup>15</sup> with 1000 bootstraps, and the models were selected using the automatic RaxML model selection tool. The substitution model chosen for both domains was LGF. For the Bayesian tree inference, we used MrBayes V3.2.6<sup>16</sup> with a Mixed model (prset aamodel=Mixed) and a gamma distribution (lset rates=Gamma). We ran the MonteCarlo for 4 million generations (std < 0.01) for the OSK domain, and for 3 million generations (std < 0.01) for the LOTUS domain.

### ***Selection of sequences for codon use analysis***

To study the codon use of the OSK and LOTUS domains, we chose 17 well-annotated (defined as possessing at least 8,000 annotated genes) insect genomes that included a confidently annotated *oskar* orthologue from the NCBI nucleotide database. The complete list and accession numbers of the sequences used for this analysis is in Supplementary Table 5. This list contains *oskar* sequences from genomes that were either added to the databases after the first *oskar* sequence search or re-annotated after said search. Therefore the sequences coming from the following organisms are not represented in the final *oskar* alignment: *Harpegnathos saltator*, *Fopius arisanus*, *Athalia rosae*, *Orussus abietinus*, *Stomoxys calcitrans*, *Bactrocera oleae*, *Neodiprion lecontei*.

### ***Generation of Intra-Gene distribution of codon use***

We wished to determine whether *oskar* differed from the null hypothesis that a given gene would follow similar codon use throughout its sequence. To generate a distribution of codon use similarity across a gene for all genes in the genomes studied, we generated what we named the “Intra-Gene” sequence distribution. Each gene was cut into two fragments at a random position “x” following the rule:  $384 < x < \text{Length\_gene} - 384$ ,  $x \text{ modulo } 3 = 0$  (Corresponding Jupyter notebook file: Scripts>notebook>Codon Analysis AT3 GC3 and A3 T3 G3 C3 Section: 4). Thus, we sampled each codon at least twice, preserving the coding frame.

### ***Fitting a linear model of codon use***

Using the Intra-Gene null distribution generated above, we fitted a linear model of codon use frequencies per gene for the wobble position and AT3 GC3 content. To do so, we measured the different frequencies of A3, T3, G3 and C3 (any codon ending in A was counted as A3) and AT3 GC3. Then, we fitted a linear model to the pairs of 5' and 3' regional codon use values for within each gene,

Blondel, Jones & Extavour Page 19 of 33

obtained from the Intra-Gene distribution described above (conserving the 3'/5' position information), and for the OSK and LOTUS domains, for each of the 17 genomes analyzed (Supp Table 3). We then calculated the residuals of the Intra-Gene distribution and the LOTUS-OSK distribution. Finally, we determined the Pearson correlation coefficient for all genomes pooled together, and all *oskar* genes pooled together (Corresponding Jupyter notebook file: Scripts>notebook>Codon Analysis AT3 GC3 and A3 T3 G3 C3 Section: 7 and 8).

### ***Calculation of cosine distance***

For a given sequence S, we assigned a vector C of dimension 64 (one for each codon). Because the sum of all codon frequencies is 1, C is normalized; we thus used the cosine similarity distance between a given pair of vectors as a metric to quantify the distance in codon use between two sequences. We measured this distance distribution between all the genes in a given genome to create the Inter-Gene distance distribution. Then, we repeated the process but measured the distance between all pairs of genes in the Intra-Gene sequence set per genome. Next, we measured the distance between the LOTUS and OSK domains for each genome. Finally, we determined the Z score of the distance between the LOTUS and OSK domains, and the Inter-Gene and Intra-Gene distance distributions (Corresponding Jupyter notebook file: Scripts>notebook>Cosine Distance Analysis).

### ***Calculation and analysis of the codon use Z\_score***

For each genome, the codon use frequency for AT3/GC3 and A3/T3/G3/C3 was calculated as described above. Then, Z scores for each sequence from the Intra-Gene, OSK or LOTUS domain sequences were calculated against the corresponding genome frequency distribution. The Z scores were then used to generate the analysis of Pearson correlation coefficients shown in Figures 3, S5 and S6 (Corresponding Jupyter notebook file: Scripts>notebook>Codon Analysis AT3 GC3 and A3 T3 G3 C3 Section: 3, 5 and 6).

### ***Data availability***

All sequences discovered using the automatic annotation pipeline described in (M&M HMM and oskar search) are annotated as such in Supplementary Table S2.

### ***Code availability***

All custom code generated for this study is available in Supplementary Information>Scripts.

## Methods References

- 1 Altschul, S. F., Gish, W., Miller, W., Myers, E. W. & Lipman, D. J. Basic local alignment search tool. *J. Mol. Biol.* **215**, 403-410, doi:10.1016/S0022-2836(05)80360-2 (1990).
- 2 Aspöck, H. *et al.* *IKITE - 1K Insect Transcriptome Evolution*, <<http://www.1kite.org/>> (2018).
- 3 Benton, M. A., Kenny, N. J., Conrads, K. H., Roth, S. & Lynch, J. A. Deep, Staged Transcriptomic Resources for the Novel Coleopteran Models *Atrachya menetriesi* and *Callosobruchus maculatus*. *PLoS ONE* **11**, e0167431, doi:10.1371/journal.pone.0167431 (2016).
- 4 Edgar, R. C. MUSCLE: a multiple sequence alignment method with reduced time and space complexity. *BMC Bioinformatics* **5**, 113 (2004).
- 5 Eddy, S. R. *HMMER: biosequence analysis using profile hidden Markov models*, <<http://hmmer.org/>> (2007).
- 6 Stanke, M., Steinkamp, R., Waack, S. & Morgenstern, B. AUGUSTUS: a web server for gene finding in eukaryotes. *Nucleic Acids Res.* **32**, W309-312, doi:10.1093/nar/gkh379 (2004).
- 7 Korf, I. Gene finding in novel genomes. *BMC Bioinformatics* **5**, 59, doi:10.1186/1471-2105-5-59 (2004).
- 8 Jeske, M. *et al.* The Crystal Structure of the *Drosophila* Germline Inducer Oskar Identifies Two Domains with Distinct Vasa Helicase- and RNA-Binding Activities. *Cell Rep* **12**, 587-598, doi:10.1016/j.celrep.2015.06.055 (2015).
- 9 Ahuja, A. & Extavour, C. G. Patterns of molecular evolution of the germ line specification gene *oskar* suggest that a novel domain may contribute to functional divergence in *Drosophila*. *Dev. Genes Evol.* **222**, 65-77 (2014).
- 10 Yang, N. *et al.* Structure of *Drosophila* Oskar reveals a novel RNA binding protein. *Proc Natl Acad Sci U S A* **112**, 11541-11546, doi:10.1073/pnas.1515568112 (2015).
- 11 Consortium, U. The Universal Protein Resource (UniProt) 2009. *Nucleic Acids Res.* **37**, D169-174, doi:10.1093/nar/gkn664 (2009).
- 12 Gerlt, J. A. *et al.* Enzyme Function Initiative-Enzyme Similarity Tool (EFI-EST): A web tool for generating protein sequence similarity networks. *Biochim. Biophys. Acta* **1854**, 1019-1037, doi:10.1016/j.bbapap.2015.04.015 (2015).
- 13 Shannon, P. *et al.* Cytoscape: a software environment for integrated models of biomolecular interaction networks. *Genome Res.* **13**, 2498-2504, doi:10.1101/gr.1239303 (2003).
- 14 Capella-Gutierrez, S., Silla-Martinez, J. M. & Gabaldon, T. trimAl: a tool for automated alignment trimming in large-scale phylogenetic analyses. *Bioinformatics* **25**, 1972-1973, doi:10.1093/bioinformatics/btp348 (2009).
- 15 Stamatakis, A. RAxML version 8: a tool for phylogenetic analysis and post-analysis of large phylogenies. *Bioinformatics* **30**, 1312-1313, doi:10.1093/bioinformatics/btu033 (2014).
- 16 Huelsenbeck, J. P. & Ronquist, F. MRBAYES: Bayesian inference of phylogenetic trees. *Bioinformatics* **17**, 754-755 (2001).

## Supplementary Information for

### Bacterial contribution to genesis of the novel germ line determinant *oskar*

*Leo Blondel, Tamsin E. M. Jones and Cassandra G. Extavour*

The Supplementary Information for this paper consists of the following elements:

1. Supplementary Discussion (this document)
2. Supplementary References (this document)
3. Folder titled “Supplementary Information Files” containing the following sub-folders
  - a. Supplementary Information Files>Alignments
    - i. *All sequences identified and analyzed in this study, in FASTA format and with corresponding Alignments*
  - b. Supplementary Information Files>BLAST search results
    - i. *Results of BLASTP searches with full length Oskar, OSK or LOTUS domains as queries*
  - c. Supplementary Information Files>Data
    - i. *Necessary files for running the different ipython notebooks:*
      1. *Taxonomy: Conversion table for UniProt ID to taxon information. (uniprot\_ID\_taxa.tsv)*
      2. *Codon\_Genes: Contains the measured codon frequency for the different genomes studied as .csv or .tsv files (organism\_name.csv/tsv), along with the DNA sequences of LOTUS and OSK domains used in the codon use analysis (LOTUS\_Sequences.gb and SGNH\_Sequences.gb)*
      3. *Trees: Contains the tree files obtained from RaxML and MrBayes phylogenetic analyses of the OSK and LOTUS domains.*
  - d. Supplementary Information Files>HMM
    - i. *HMM models used for iterative searching for sequences similar to full-length Oskar, LOTUS and OSK domains*
  - e. Supplementary Information Files>Scripts
    - i. *All custom scripts used to implement the analysis pipelines described.*
  - f. Supplementary Information Files>Tables
    - i. *Supplementary Tables S1-S5 describing databases searched/analyzed and all search results; Legends in this document*

Please download Supplementary Information Files here:

[https://www.dropbox.com/s/q4sd5rty24gxprg/Blondel\\_Jones\\_Extavour\\_HGT\\_Supplementary%20Information%20Files.zip?dl=0](https://www.dropbox.com/s/q4sd5rty24gxprg/Blondel_Jones_Extavour_HGT_Supplementary%20Information%20Files.zip?dl=0)

## Supplementary Discussion

### ***Phylogenetic relationships of the Oskar LOTUS domain***

LOTUS sequences from non-Oskar proteins that were sufficiently similar to the Osk LOTUS domain to be included in an alignment for phylogenetic analysis, were almost exclusively eukaryotic. (Supplementary Table 3). Only three bacterial sequences matched the LOTUS domain with an E-value < 0.01, and were included in the alignment (Supplementary Table 3). Osk LOTUS domains clustered into two distinct clades, one comprising all Dipteran sequences, and the other comprising all other Osk LOTUS domains examined from both holometabolous and hemimetabolous orders (Fig. 2a). Dipteran Osk LOTUS sequences formed a monophyletic group that branched sister to a clade of LOTUS domains from Tud5 family proteins of non-arthropod animals (NAA). NAA LOTUS domains from Tud7 family members were polyphyletic, but most of them formed a clade branching sister to (Osk LOTUS + NAA Tud5 LOTUS). Non-Dipteran Osk LOTUS domains formed a monophyletic group that was related in a polytomy to the aforementioned (NAA Tud7 LOTUS + (Dipteran Osk LOTUS + NAA Tud5 LOTUS)) clade, and to various arthropod Tud7 family LOTUS domains.

The fact that Tud7 LOTUS domains are polyphyletic suggests that arthropod domains in this family may have undergone heterogeneous evolutionary processes relative to their homologues in other animals. The relationships of Dipteran LOTUS sequences were consistent with the current hypothesis for interrelationships between Dipteran species<sup>1</sup>. Similarly, among the non-Dipteran Osk LOTUS sequences, the hymenopteran sequences form a clade to the exclusion of the single hemimetabolous sequence (from the cricket *Gryllus bimaculatus*), consistent with the monophyly of Hymenoptera<sup>2</sup>. It is unclear why Dipteran Osk LOTUS domains cluster separately from those of other insect Osk proteins. We speculate that the evolution of the Long Oskar domain<sup>3,4</sup>, which appears to be a novelty within Diptera (Supplementary Files: Alignments>OSKAR\_FINAL.fasta), may have influenced the evolution of the Osk LOTUS domain in at least some of these insects. Consistent with this hypothesis, of the 17 Dipteran *oskar* genes we examined, the seven *oskar* genes possessing a Long Osk domain clustered into two clades based on the sequences of their LOTUS domain. One of these clades comprised five *Drosophila* species (*D. willistoni*, *D. mojavensis*, *D. virilis*, *D. grimshawi* and *D. immigrans*), and the second was composed of two calyptrate flies from different superfamilies, *Musca domestica* (Muscoidea) and *Lucilia cuprina* (Oestroidea).

In summary, the LOTUS domain of Osk proteins is most closely related to a number of other LOTUS domains found in eukaryotic proteins, as would be expected for a gene of animal origin, and the phylogenetic interrelationships of these sequences is largely consistent with the current species or family level trees for the corresponding insects.

### ***Phylogenetic relationships of the Oskar OSK domain***

The only eukaryotic proteins emerging from the iterative HMMER search for OSK domain sequences that had an E-value < 0.01 were all from fungi. All five of these sequences were annotated as Carbohydrate Active Enzyme 3 (CAZ3). Most bacterial sequences used in this analysis were annotated as lipases and hydrolases, with a high representation of GDSL-like hydrolases (Supplementary Table S4). OSK sequences formed a monophyletic group but did not branch sister to the other eukaryotic sequences in the analysis. Instead, all CAZ3 sequences formed a clade that was sister to a clade of primarily Firmicutes. We recovered a monophyletic group of Proteobacteria nested within that Firmicutes clade. All Bacteroidetes sequences also formed a monophyletic group, which branched sister to all other sequences except for the two Archaeal sequences in the analysis. Within the OSK clade, the topology of sequence relationships was largely concordant with the species tree for insects<sup>5</sup>, as we recovered monophyletic Diptera to the exclusion of other insect species. However, the single orthopteran OSK sequence (from the cricket *Gryllus bimaculatus*) grouped within the Hymenoptera,



rather than branching basally to all insect sequences as would be expected for this hemimetabolous sequence.

## Supplementary Table Legends

(see Supplementary Information Files>Tables>Supp TableX)

### **Supplementary Table S1: List of genomes and transcriptomes used for automated *oskar* search.**

List of genomes and transcriptomes that were downloaded, annotated, and searched for *oskar* sequences (see “Hidden Markov Model (HMM) generation and alignments of the OSK and LOTUS domains” in Methods). The table reports the database provenance (NCBI genome or TSA, or 1KITE database) and the accession number. The TSA accession ID can be searched using the NCBI TSA browser here: <https://www.ncbi.nlm.nih.gov/Traces/wgs/?view=TSA>.

### **Supplementary Table S2: List of *oskar* sequences used in the final alignment.**

List of accession numbers and database provenance of the sequences used in the final alignments of Oskar analysed herein. The table contains the database provenance (*Type*), the database accession number (*ID*), the species, family and order, and extraction notes.

### **Supplementary Table S3: List of sequences used for phylogenetic analysis of the LOTUS domain.**

The sequences were obtained by searching the TrEMBL database using hmmsearch and the final HMM generated for LOTUS (Supplementary files: HMM>LOTUS.hmm). Reported are the UniProtID (*Accession Number*), the Domain and Phylum origin of the sequence, the E-value, score and bias given by hmmsearch, and the description of the target from UniProt. To obtain sequences for each entry, either search UniProt directly (<https://www.uniprot.org/>) or consult the final alignment in Supplementary Files: Alignments>LOTUS\_TREE.fasta.

### **Supplementary Table S4: List of sequences used for phylogenetic analysis of the OSK domain.**

The sequences were obtained by searching the TrEMBL database using hmmsearch and the final HMM generated for OSK (Supplementary files: HMM>OSK.hmm). Reported parameters are as described for Supplementary Table S3. To obtain sequences for each entry, either search UniProt directly (<https://www.uniprot.org/>) or consult the final alignment in Supplementary Files: Alignments>OSK\_TREE.fasta.

### **Supplementary Table S5: List of genomes analyzed for codon use.**

This table lists the 17 genomes that were downloaded and analyzed for codon use as described in “Selection of sequences for codon use analysis” in Methods. All genomes can be downloaded from <https://www.ncbi.nlm.nih.gov/genome/browse#!/overview/>. The table lists the species name (*Species*), family (*Family*) and Order (*Order*), NCBI genome accession number (*Genome ID*), and the *oskar* NCBI Nucleotide accession number (*oskar Nucleotide ID*).

## Supplementary References

- 1 Kirk-Spriggs, A. H. & Sinclair, B. J. Vol. 1 (South African National Biodiversity Institute, Pretoria, South Africa, 2017).
- 2 Peters, R. S. *et al.* Evolutionary History of the Hymenoptera. *Curr. Biol.* **27**, 1013-1018, doi:10.1016/j.cub.2017.01.027 (2017).
- 3 Vanzo, N. F. & Ephrussi, A. Oskar anchoring restricts pole plasm formation to the posterior of the *Drosophila* oocyte. *Development* **129**, 3705-3714 (2002).
- 4 Hurd, T. R. *et al.* Long Oskar Controls Mitochondrial Inheritance in *Drosophila melanogaster*. *Dev Cell* **39**, 560-571, doi:10.1016/j.devcel.2016.11.004 (2016).
- 5 Misof, B. *et al.* Phylogenomics resolves the timing and pattern of insect evolution. *Science* **346**, 763-767, doi:10.1126/science.1257570 (2014).

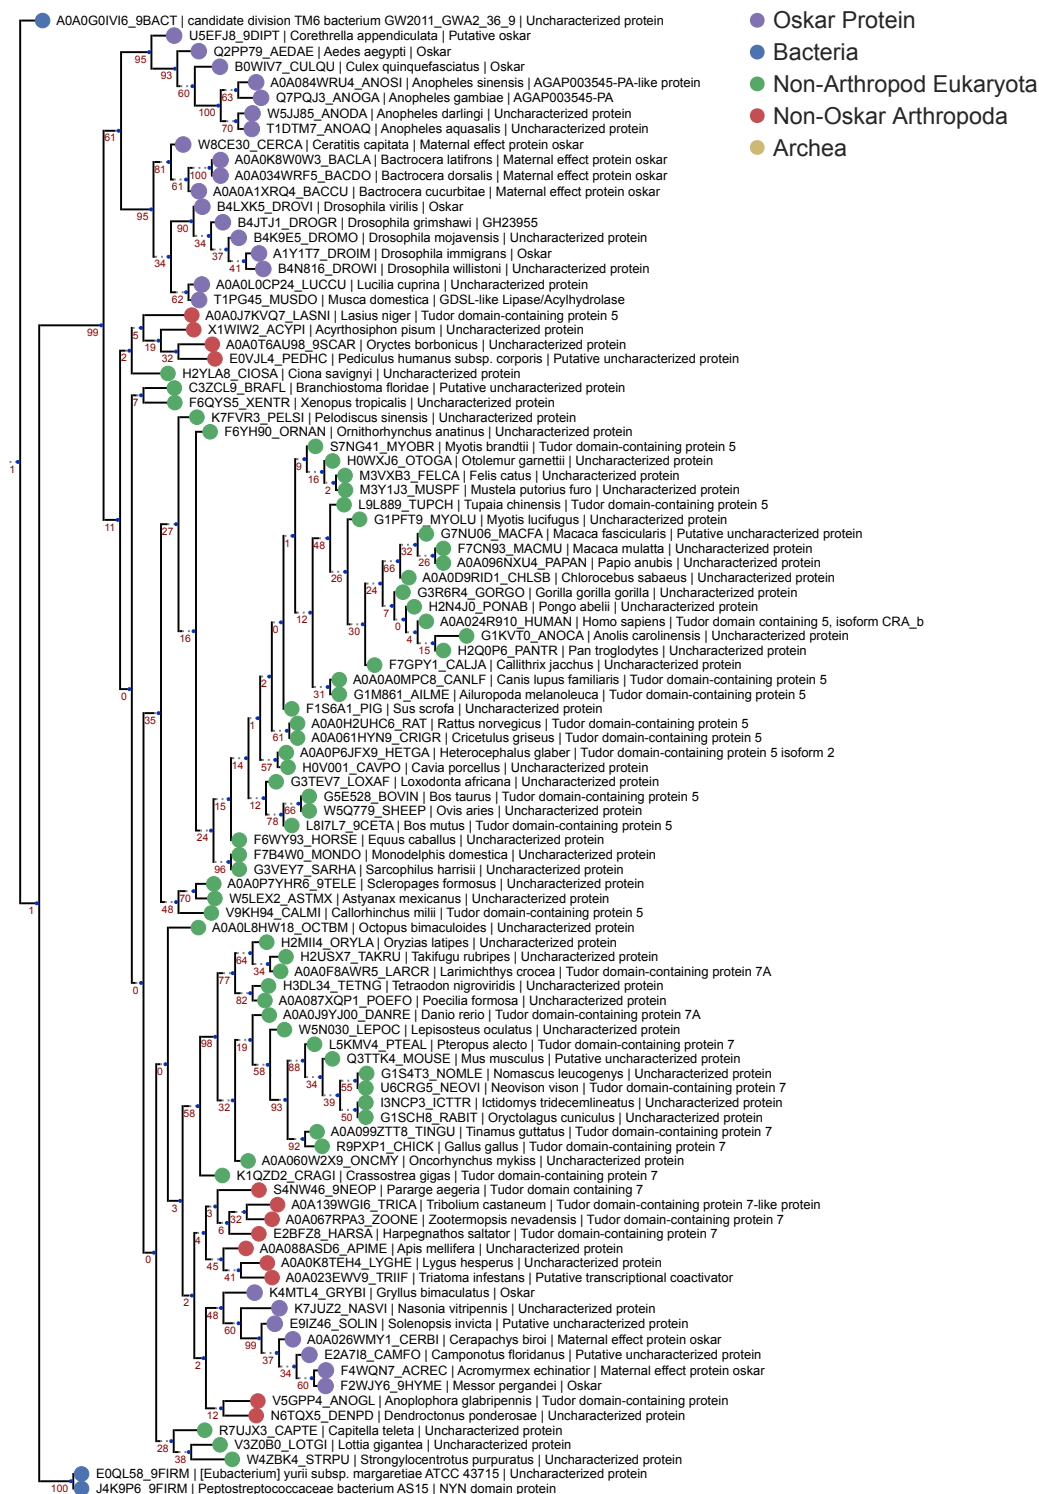

**Extended Data Figure S1: LOTUS Domain RaxML Tree.** Phylogenetic tree of the HMMER sequences retrieved from the UniProt database using the LOTUS alignment HMM model. The top 97 hits were selected for phylogenetic analysis, and the only three bacterial sequences found to be a match were added to the alignment manually. The resulting 100 sequences were aligned using MUSCLE with default settings. The sequences were filtered to contain only one sequence per species (best E-value kept) yielding 100 sequences for analysis. Finally, the tree was created using RaxML v8.2.4, using 1000 bootstraps and model selection performed by the RaxML automatic model selection tool. See “Phylogenetic Analysis” in Methods for further detail. Sequences are color-coded as follows: Purple = Oskar; Red = Non-Oskar Arthropod; Green = Non-Arthropod Eukaryote; Blue = Bacteria. Names following leaves display the UniProt accession number followed by the species name and the UniProt protein name.

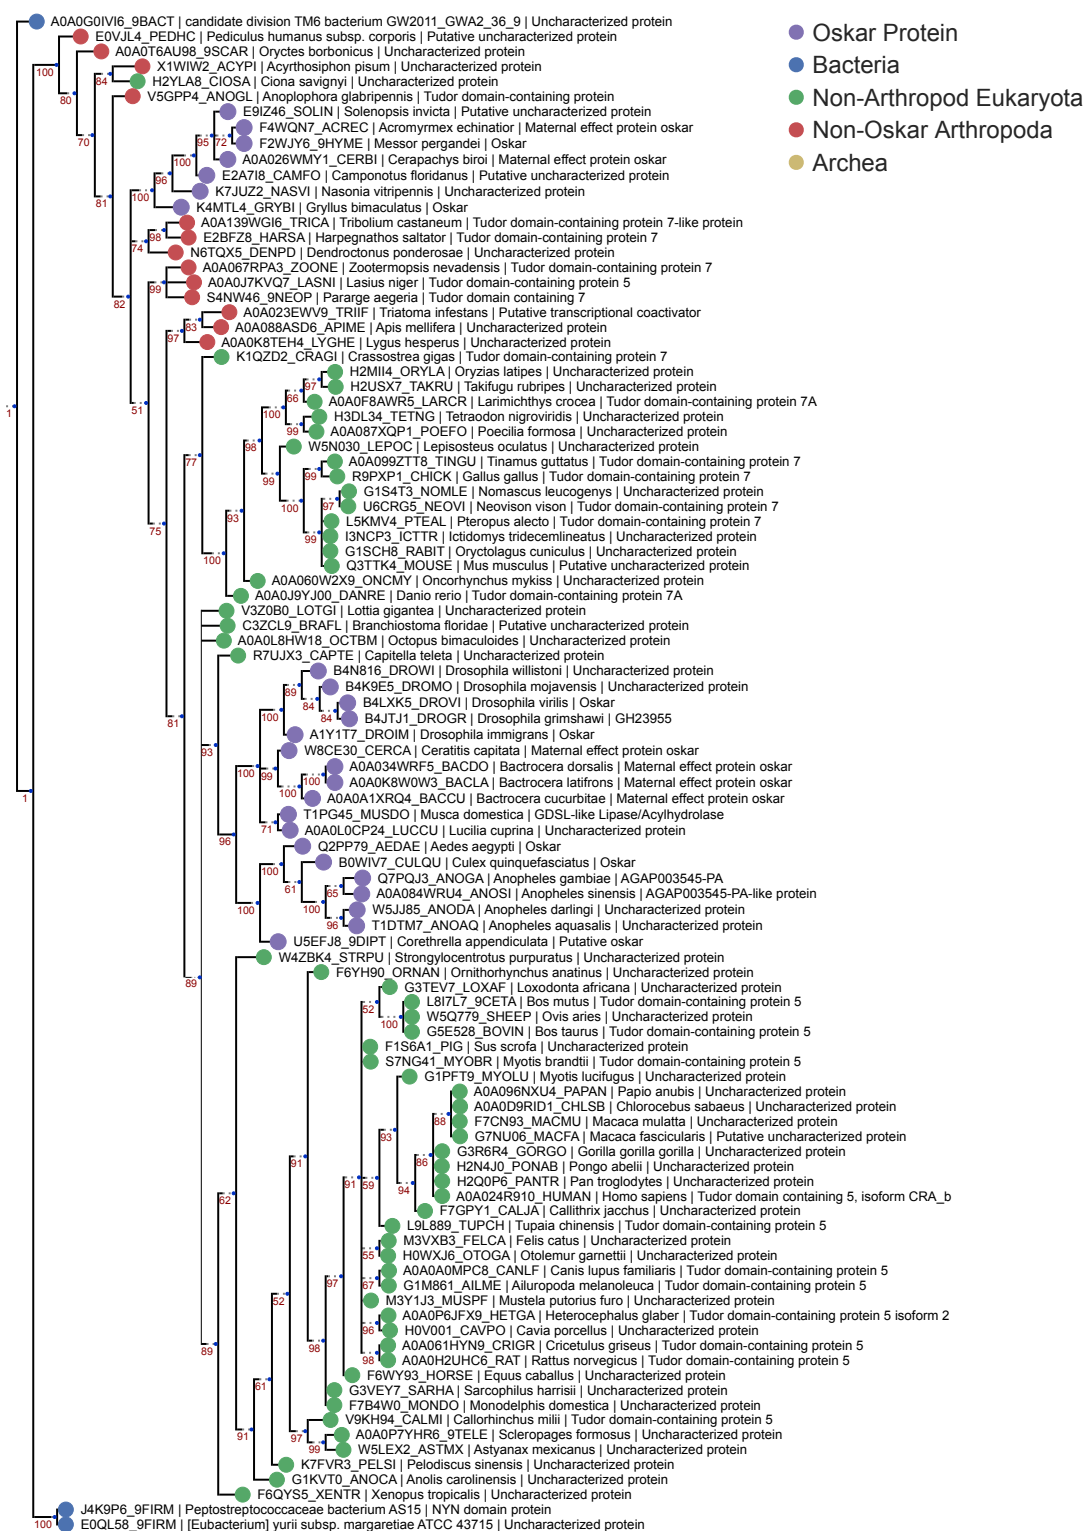

**Extended Data Figure S2: LOTUS Domain Bayesian Tree.** Phylogenetic tree of the HMMER sequences retrieved from the UniProt database using the LOTUS alignment HMM model. 100 sequences were chosen for analysis as described for Supplementary Figure 1. The tree was created using Mr Bayes V3.2.6 using a Mixed model (prset aamodel=Mixed) and a gamma distribution (lset rates=Gamma). The algorithm was allowed to run for 3 million generations to achieve a std < 0.01. See “Phylogenetic Analysis” in Methods for further detail. Sequences are color-coded as follows: Purple = Oskar; Red = Non-Oskar Arthropod; Green = Non-Arthropod Eukaryote; Blue = Bacteria. Names following leaves display the UniProt accession number followed by the species name and the UniProt protein name.

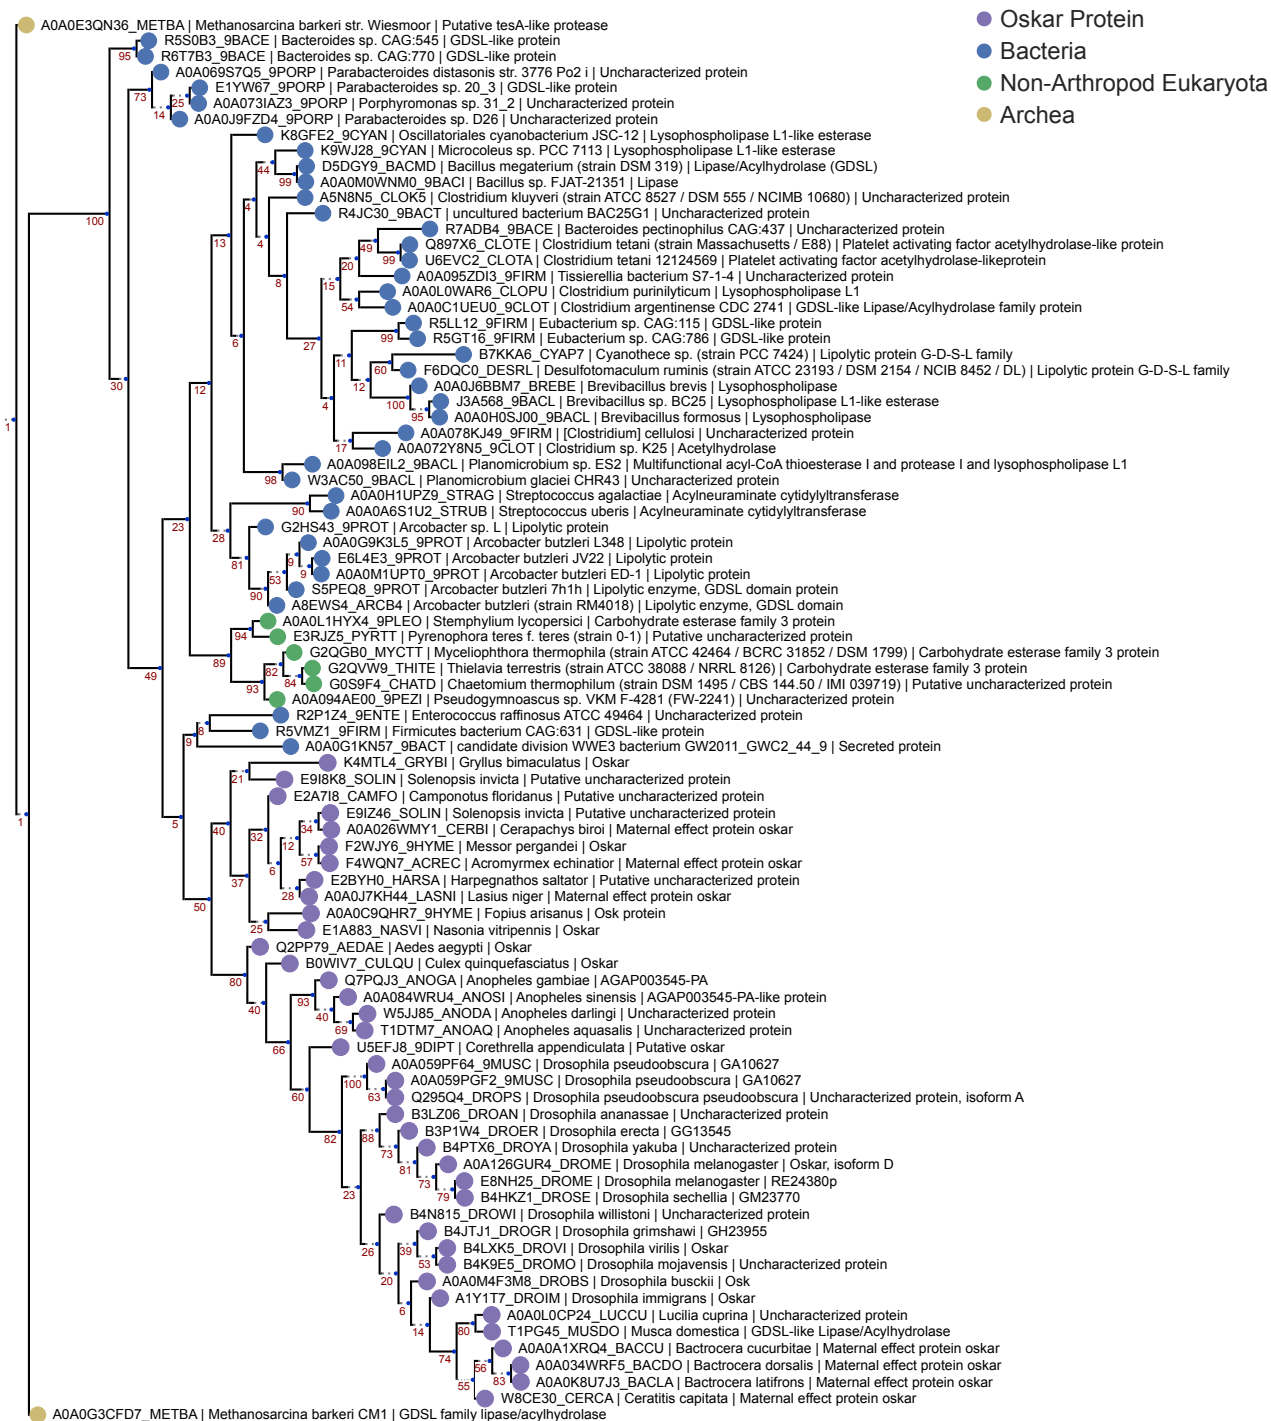

**Extended Data Figure S3: OSK Domain RaxML Tree.** Phylogenetic tree of the HMMER sequences retrieved from the UniProt database using the OSK alignment HMM model. The top 95 hits were selected for phylogenetic analysis, and the only five non-Oskar eukaryotic sequences found to be a match were added to the alignment manually. The resulting 100 sequences were aligned using MUSCLE with default settings. The sequences were filtered to contain only one sequence per species (best E-value kept), yielding 87 sequences for analysis. Finally, the tree was created using RaxML v8.2.4, using 1000 bootstraps and model selection performed by the RaxML automatic model selection tool. See “Phylogenetic Analysis” in Methods for further detail. Sequences are color-coded as follows: Purple = Oskar; Red = Non-Oskar Arthropod; Green = Non-Arthropod Eukaryote; Blue = Bacteria. Names following leaves display the UniProt accession number followed by the species name and the UniProt protein name.

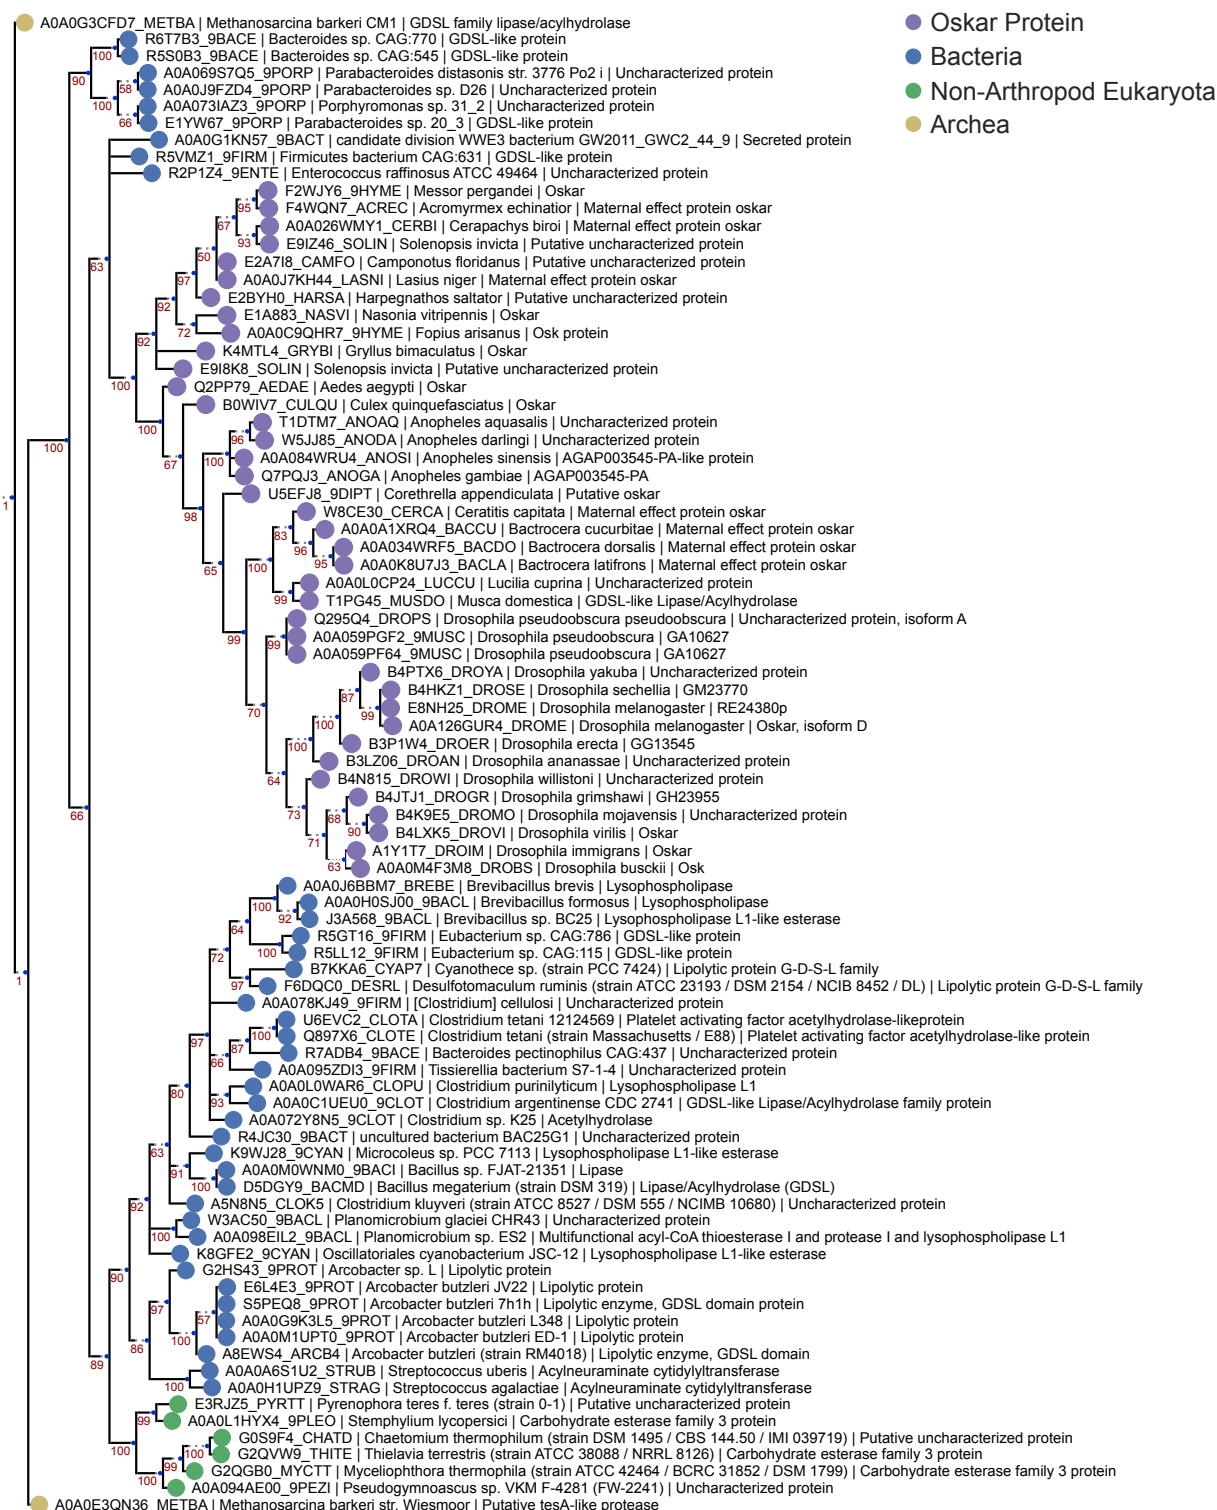

**Extended Data Figure S4: OSK Domain Bayesian Tree.** Phylogenetic tree of the HMMER sequences hit on the UniProt database using the OSK alignment HMM model. 87 sequences were chosen for analysis as described for Supplementary Figure 3. The tree was created using Mr Bayes V3.2.6 using a Mixed model (prset aamodel=Mixed) and a gamma distribution (lset rates=Gamma). The algorithm was allowed to run for 4 million generations to achieve a std < 0.01. See “Phylogenetic Analysis” in Methods for further detail. Sequences are color-coded as follows: Purple = Oskar; Red = Non-Oskar Arthropod; Green = Non-Arthropod Eukaryote; Blue = Bacteria. Names following leaves display the UniProt accession number followed by the species name and the UniProt protein name.

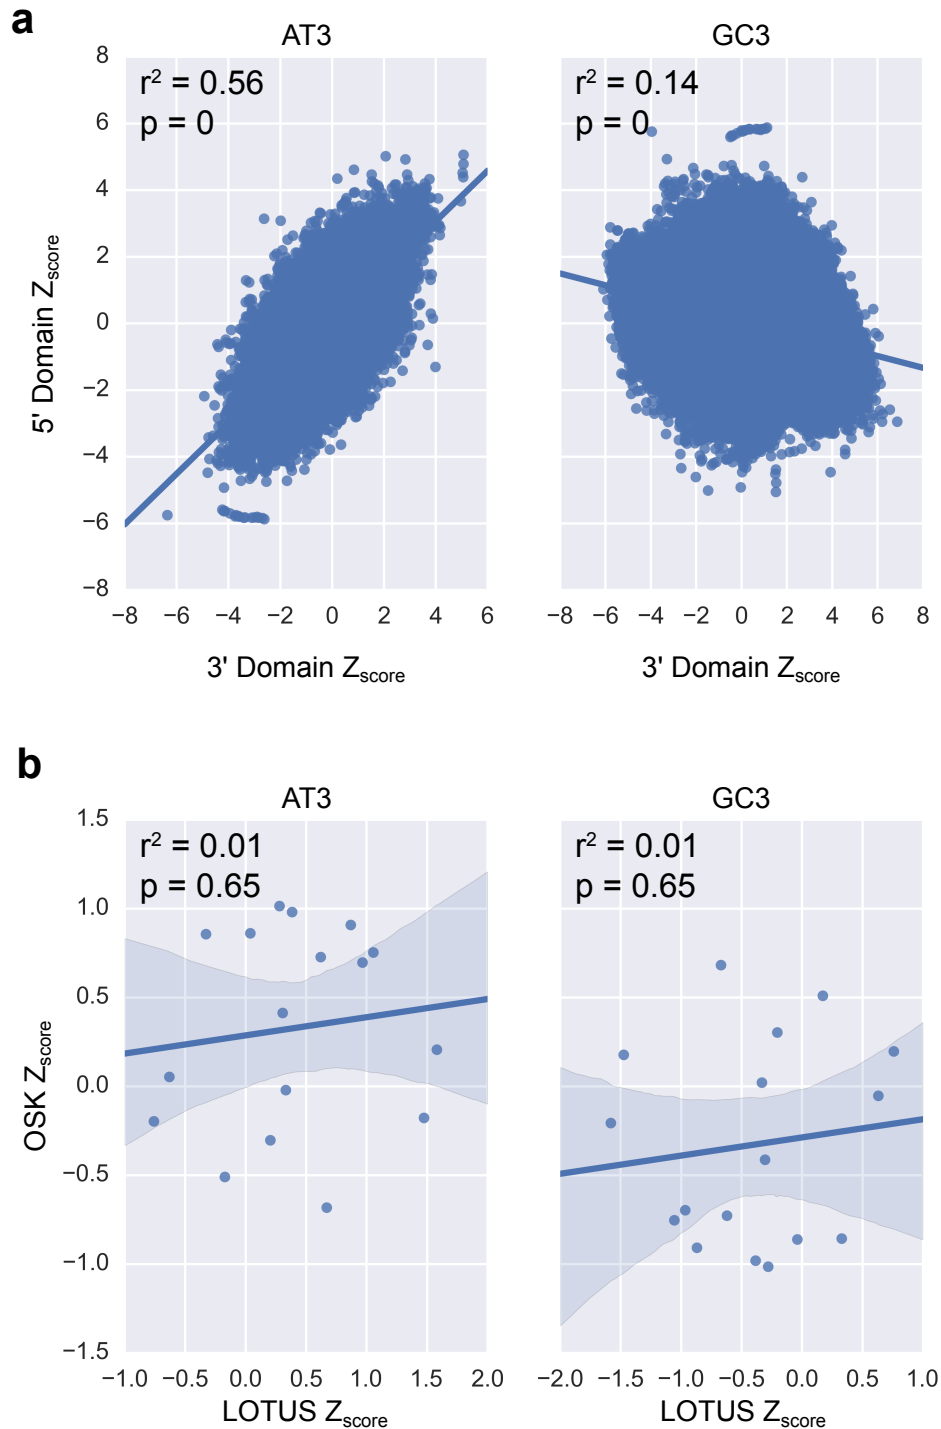

**Extended Data Figure S5: AT3/GC3 correlations between the LOTUS and OSK domains.** (a) Intra-Gene distribution scatter plot for the coding sequences of the 17 genomes analyzed. Sequences were cut into two parts as per the description in Methods “Generation of intra-gene distribution of codon use”. The AT3 and GC3 codon use was measured and a Z-score was calculated against the genome distribution. Finally, the 5' and 3' “domain” values were plotted against each other and a linear regression was . The AT3 and GC3 content is generally similar in the 5' and 3' regions of all genes across the genome (AT3:  $r^2 = 0.56$ ,  $p = 0$ ; GC3:  $r^2 = 0.14$ ,  $p = 0$ ). (b) OSK vs LOTUS AT3 and GC3 use across the 17 genomes analyzed. The AT3 and GC3 content Z-scores were calculated against the genome distribution. The AT3 and GC3 content of the two domains of the Oskar gene are not correlated with each other. (AT3:  $r^2 = 0.01$ ,  $p = 0.65$ ; GC3:  $r^2 = 0.01$ ,  $p = 0.65$ ).



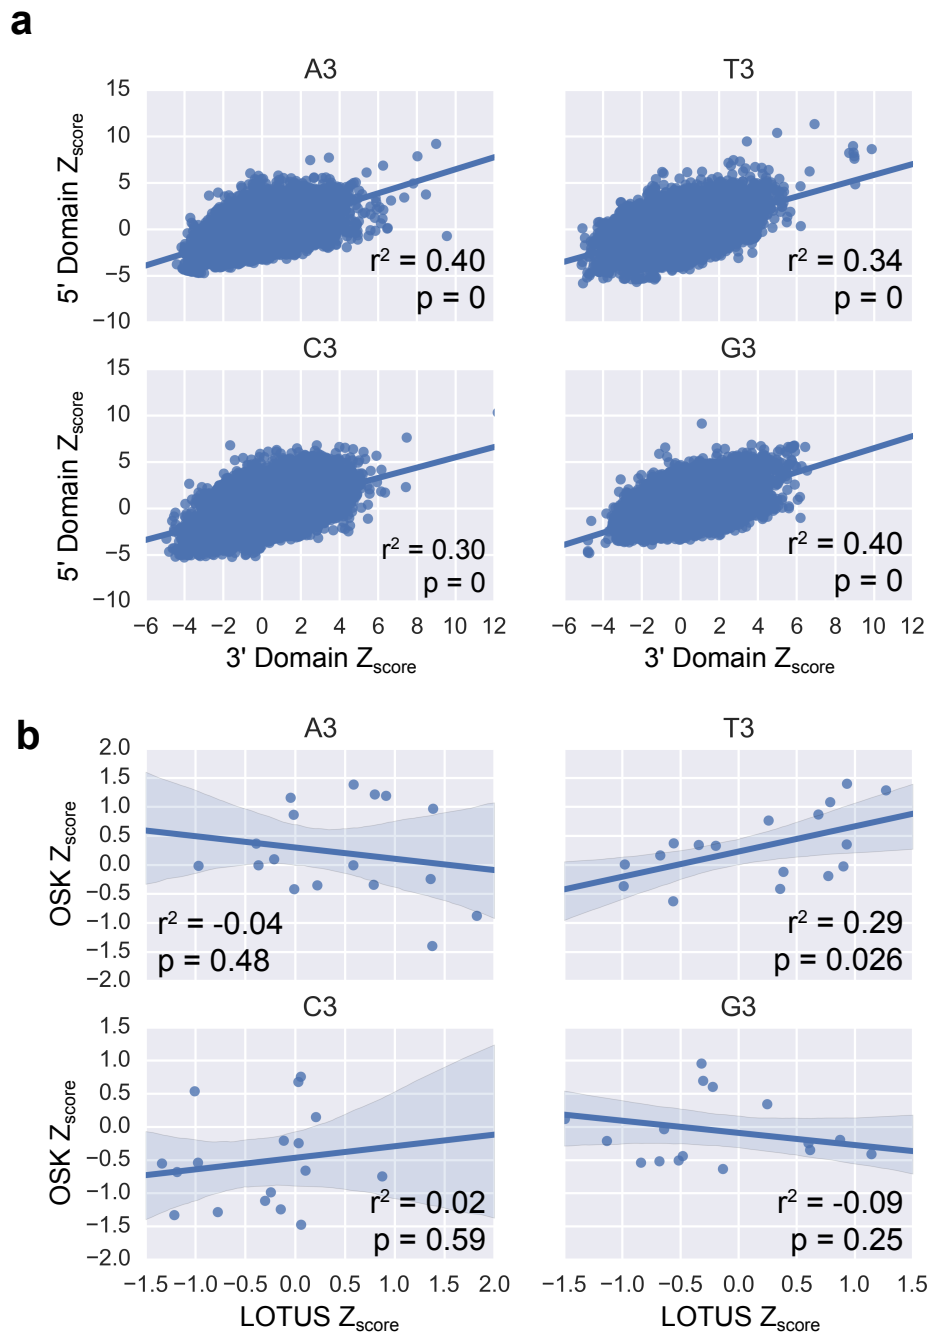

1  
2 **Extended Data Figure S6: A3/T3/G3/C3 correlations between the LOTUS and OSK domains.** (a) Intra-Gene  
3 distribution scatter plot for the coding sequences of the 17 genomes analyzed. Sequences were cut into two parts as  
4 per the description in Methods “Generation of intra-gene distribution of codon use”. The A3, T3, G3 and C3 codon  
5 use was measured, and Z-score calculations, value plots and linear regression were performed as described for  
6 Supplementary Figure 5. The A3, T3 G3 and C3 content is generally similar in the 5' and 3' regions of all genes across  
7 the genome (A3:  $r^2 = 0.40$ ,  $p = 0$ ; T3:  $r^2 = 0.34$ ,  $p = 0$ ; G3:  $r^2 = 0.40$ ,  $p = 0$ ; C3:  $r^2 = 0.30$ ,  $p = 0$ ). (b) OSK vs LOTUS  
8 A3, T3, G3 and C3 use across the 17 genomes analyzed. The A3, T3, G3 and C3 content Z-score were calculated  
9 against the genome distribution. The A3, G3 and C3 content of the two domains of the Oskar gene are not correlated  
10 with each other. However, the T3 distribution follows a linear correlation similar to the one found across the Intra-  
11 Gene distribution (A3:  $r^2 = -0.04$ ,  $p = 0.48$ ; T3:  $r^2 = 0.29$ ,  $p = 0.026$ ; G3:  $r^2 = -0.09$ ,  $p = 0.25$ ; C3:  $r^2 = 0.02$ ,  $p = 0.59$ ).
